# Supplementary material
Source: Springer Nature journal article supplement (https://www.springermedizin.de/resource/supplementary/12891_2013_2419_MOESM12_ESM.pdf/9510206)
Supplement: MOESM12 [file 9510206]

**References obtained through literature search (n = 1045)**  
PubMed (n = 520)  
Embase (n = 311)  
Medline in-process (n = 52)  
Cochrane library (n = 147)  
Clinicaltrials.gov (n = 15)

**Articles excluded (n = 921)**  
Not OA (n = 118)  
Length of trial (n = 217)  
Not a treatment of interest (n = 332)  
Not an outcome of interest (n = 85)  
Not an RCT (n = 166)  
Animal study (n = 3)

**Articles further reviewed (n = 124)**

**Articles excluded (n = 72)**  
Not OA (n = 8)  
Length of trial (n = 13)  
Not a treatment of interest (n = 21)  
Not an outcome of interest (n = 19)  
Not an RCT (n = 6)  
Duplicate study (n = 5)

**Articles selected for inclusion (n = 52)**

**Articles excluded (n = 20)**  
Did not contain sufficient information for analysis after author contacted up to 3 times (n = 19)  
Full publication not available (n = 1)

**Articles included in final analysis (n = 32\*)**
